# Supplementary material for: Enhancing electrocatalytic nitrogen reduction to ammonia with rare earths (La, Y, and Sc) on high-index faceted platinum alloy concave nanocubes
Source: Royal Society of Chemistry journal article supplement (doi:10.1039/d1ta05515a), 2021-01-01
Supplement: d1ta05515a1.pdf [file d1ta05515a1.pdf]

Electronic Supplementary Information (ESI)

**Enhancing electrocatalytic nitrogen reduction to ammonia  
with rare earth (La, Y, Sc) on high-index faceted platinum  
alloy concave nanocubes**

Yu-Jie Mao,<sup>‡a</sup> Feng Liu,<sup>‡a</sup> You-Hu Chen,<sup>b</sup> Xin Jiang,<sup>a</sup> Xin-Sheng Zhao,<sup>a</sup> Tian  
Sheng,<sup>\*c</sup> Jin-Yu Ye,<sup>b</sup> Hong-Gang Liao,<sup>b</sup> Lu Wei,<sup>\*a</sup> Shi-Gang Sun<sup>\*b</sup>

<sup>a</sup> School of Physics and Electronic Engineering, Jiangsu Normal University, Xuzhou  
221116, China

<sup>b</sup> State Key Lab of PCOSS, College of Chemistry and Chemical Engineering, Xiamen  
University, Xiamen 361005, China

<sup>c</sup> College of Chemistry and Materials Science, Anhui Normal University, Wuhu  
241000, China

<sup>\*</sup> Corresponding authors

E-mail addresses: lwei057@jsnu.edu.cn (L. Wei), sgsun@xmu.edu.cn (S. Sun),  
tsheng@ahnu.edu.cn (T. Sheng)

<sup>‡</sup> These authors contributed equally to this work.

# 1. Electrodeposition behaviors of Pt and rare earth metals in ChCl-U based DES

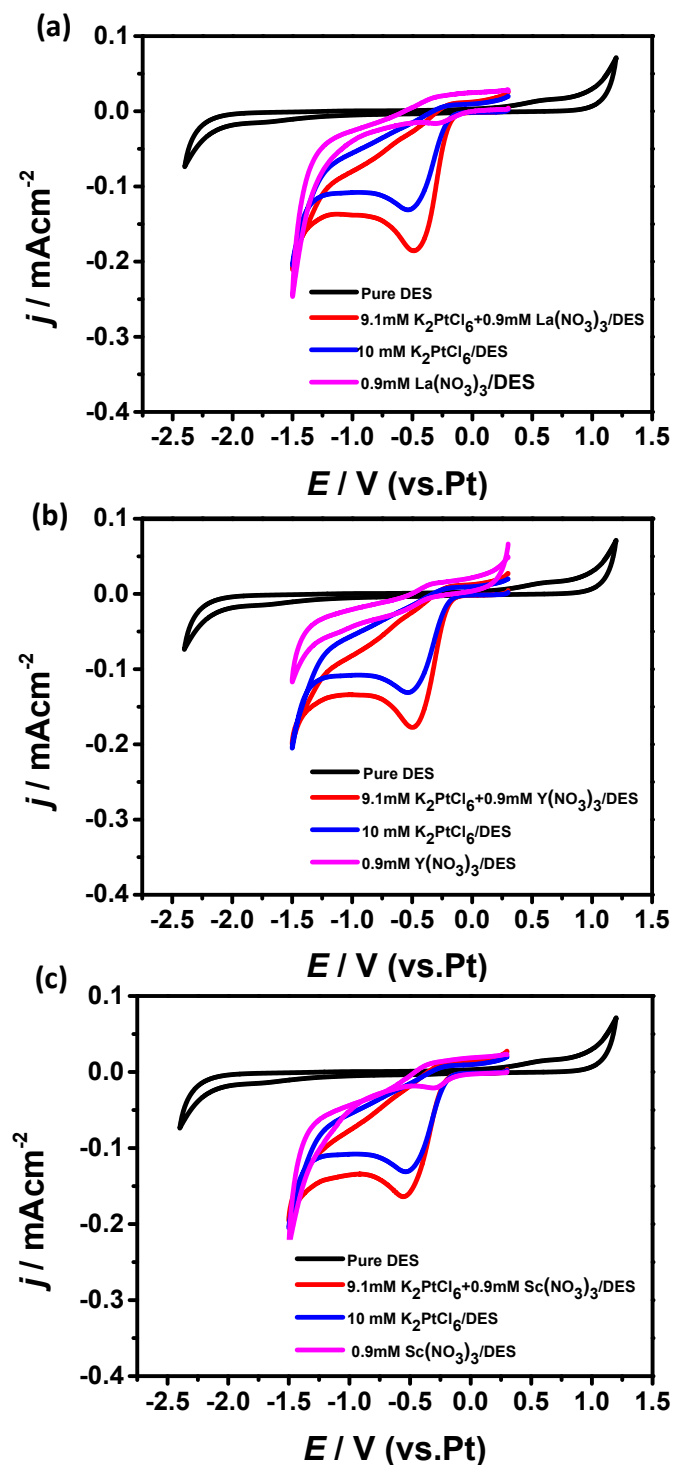

**Fig. S1.** Cyclic voltammograms recorded on GC electrode in different solutions. Scan rate: 50 mV s<sup>-1</sup>; Temperature: 80 °C.

Fig. S1(a) exhibits the electrodeposition behaviors of Pt and La. The cyclic voltammograms (CVs) of a GC electrode in the pure choline chloride-urea (ChCl-U) based deep eutectic solvent (DES) (black curve) and ChCl-U based DES solutions containing 0.9 mM  $\text{La}(\text{NO}_3)_3$  (magenta curve), 10 mM  $\text{K}_2\text{PtCl}_6$  (blue curve) and 9.1 mM  $\text{K}_2\text{PtCl}_6$  + 0.9 mM  $\text{La}(\text{NO}_3)_3$  (red curve) were performed at a scan rate of 50 mV  $\text{s}^{-1}$  at 80 °C. According to the black curve, it can be clearly observed that the ChCl-U based DES exhibits an electrochemical stability window of around 3 V on GC, ranging from -2 V to 1 V with respect to the Pt quasi-reference electrode. The magenta curve shows that there are two cathodic peaks at -0.34 V and -1.25 V, corresponding to La deposition on GC. The distinct reduction process is observed at -0.56 V from the blue curve, which is attributed to the Pt deposition. The red curve was recorded in a ChCl-U based DES solution containing 9.1 mM  $\text{K}_2\text{PtCl}_6$  and 0.9 mM  $\text{La}(\text{NO}_3)_3$ . It is worth noting that, there yield slightly variation especially for the higher cathodic peak current and more positive cathodic peak potential (-0.55 V), the feature of the CV profile is similar to that obtained in 10 mM  $\text{K}_2\text{PtCl}_6$  of ChCl-U based DES solution (blue curve). The electrodeposition behaviors of Y and Sc are the same as La, as shown in Fig. S1(b and c). These results indicate that, within the electrochemical stability range of ChCl-U based DES, Pt and RE (RE = La, Y, Sc) are coelectrodeposited and successfully form alloys on the GC electrode without the interference of any electrolyte decomposition reaction.

## 2. Theoretical values and atomic models of high-index planes

**Table S1.** The calculated values for the angles of different high-index planes of Miller indices  $\{hk0\}$  with the  $\{100\}$  plane.

| $\{hk0\}$         | $\{210\}$ | $\{310\}$ | $\{410\}$ | $\{510\}$ |
|-------------------|-----------|-----------|-----------|-----------|
| $\theta / ^\circ$ | 26.56     | 18.43     | 14.03     | 11.31     |

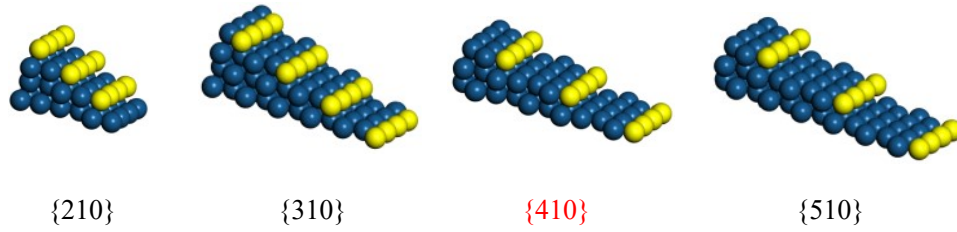

**Fig. S2.** Atomic models of high-index  $\{210\}$ ,  $\{310\}$ ,  $\{410\}$  and  $\{510\}$  planes, respectively.

### 3. ICP-MS analysis

**Table S2.** ICP-MS results of as-synthesized Pt-RE (RE = La, Y, Sc) alloys and Pt concave nanocubes.

| Samples                            | Pt    | Pt-La |       | Pt-Y  |       | Pt-Sc |       |
|------------------------------------|-------|-------|-------|-------|-------|-------|-------|
| Elements                           | Pt    | Pt    | La    | Pt    | Y     | Pt    | Sc    |
| Contents ( $\mu\text{g}$ )         | 0.490 | 0.598 | 0.024 | 0.504 | 0.091 | 0.457 | 0.032 |
| Atomic ratio of Pt/RE              | 100/0 | 96/4  |       | 98/2  |       | 93/7  |       |
| Catalyst loading ( $\mu\text{g}$ ) | 0.490 | 0.622 |       | 0.595 |       | 0.489 |       |

### 4. EDX analysis

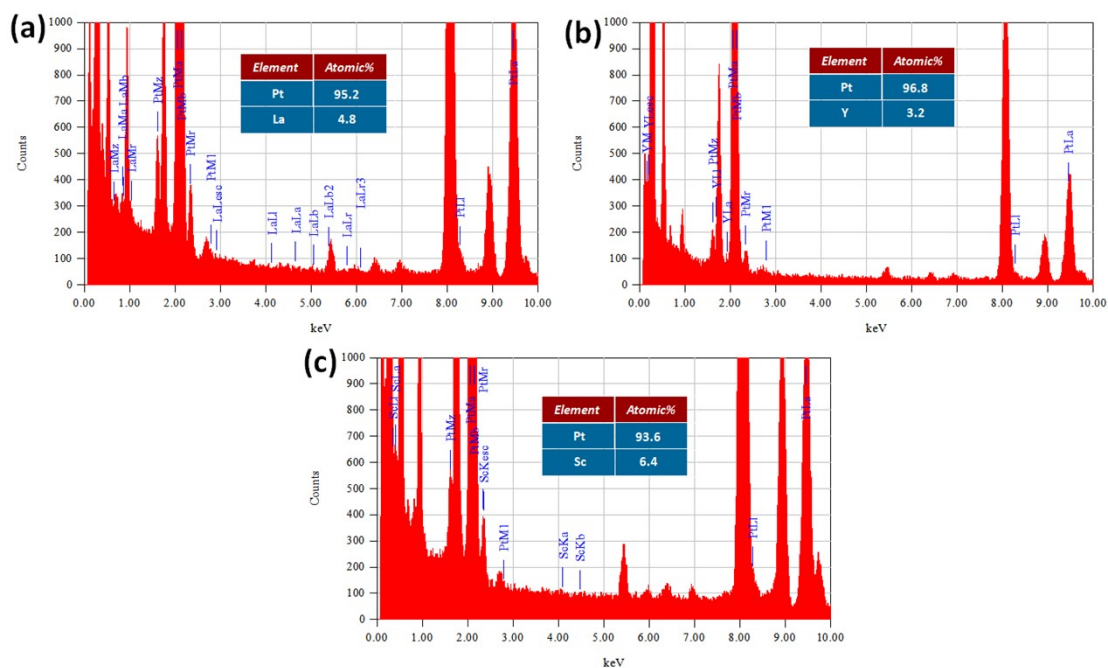

**Fig. S3.** EDX of the as-prepared PtRENCs: (a) Pt-La, (b) Pt-Y, (c) Pt-Sc.

## 5. Cyclic voltammograms

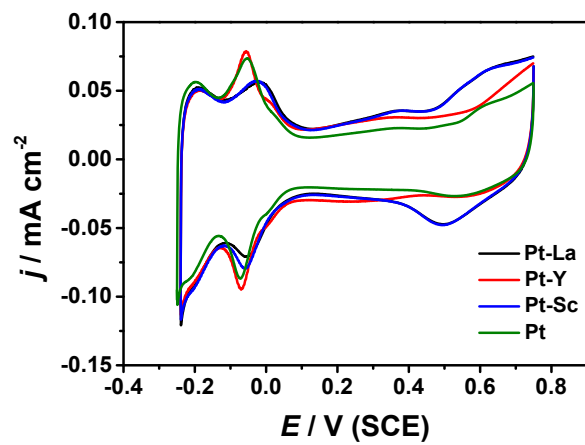

**Fig. S4.** Cyclic voltammograms of concave cubic Pt-La, Pt-Y, Pt-Sc and Pt NCs in 0.1 M HClO<sub>4</sub> solution. Scan rate: 50 mV s<sup>-1</sup>; temperature: 25 °C.

## 6. Potentiostatic NRR experiments

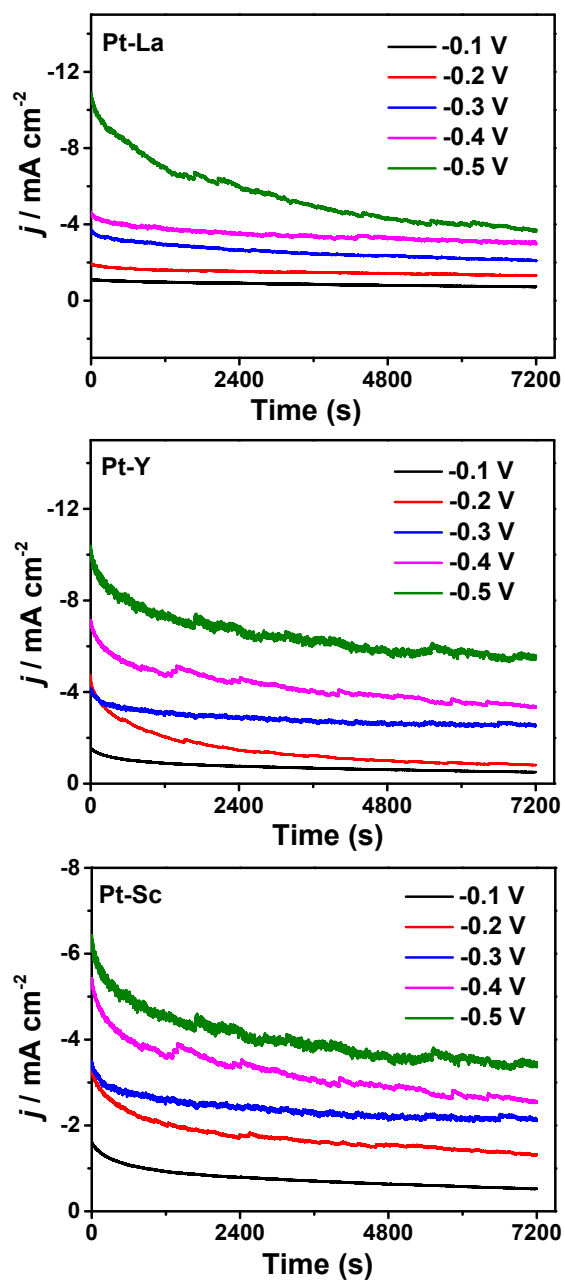

**Fig. S5.**  $i$ - $t$  curves of NRR over concave cubic Pt-La, Pt-Y and Pt-Sc alloy NCs in 1 mM HCl solution at different potentials for 2 hr.

## 7. Calibration curve of $\text{NH}_4^+$ ion concentration

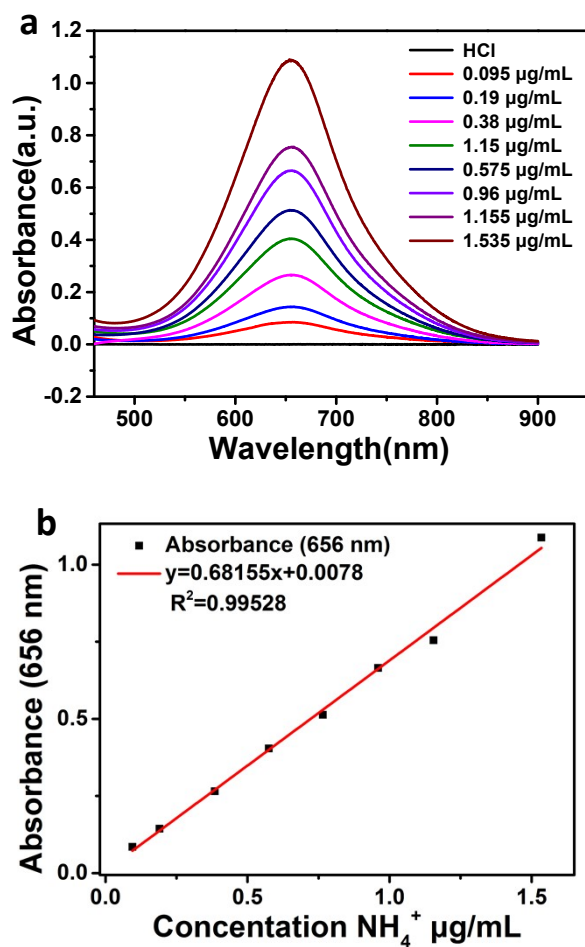

**Fig. S6.** Absolute calibration of the indophenol blue method using ammonium chloride solutions of known concentration as standards. (a) UV-Vis curves of indophenol assays with  $\text{NH}_4^+$  ions after incubated for 1 hour at room temperature; (b) calibration curve used for estimation of  $\text{NH}_3$  by  $\text{NH}_4^+$  ion concentration. The absorbance at 656 nm was measured by UV-Vis spectrophotometer, and the fitting curve shows good linear relation of absorbance with  $\text{NH}_4^+$  ion concentration ( $y = 0.6815x + 0.0078$ ,  $R^2 = 0.99528$ ) of three times independent calibration curves.



## 8. NH<sub>3</sub> yield rates normalized to the electroactive surface areas

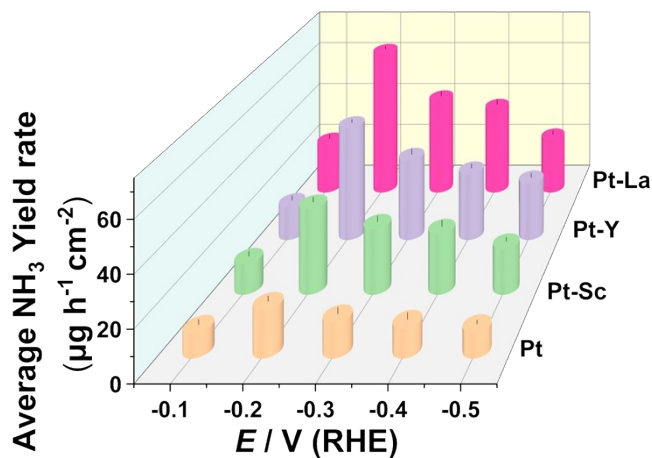

**Fig. S7.** The NH<sub>3</sub> yield rates of concave cubic Pt-La, Pt-Y, Pt-Sc and Pt NCs at different potentials.

Fig. S7. shows the NH<sub>3</sub> yield rate normalized to the electroactive surface areas, which is calculated by the following equation:

$$r(NH_3) = \frac{[NH_3] \times V}{t \times A}$$

Where  $A$  is the electrochemically active surface area, which was calculated from the electric charge of hydrogen adsorption/desorption on catalyst surface.

## 9. TEM characterization of commercial Pt/C catalyst

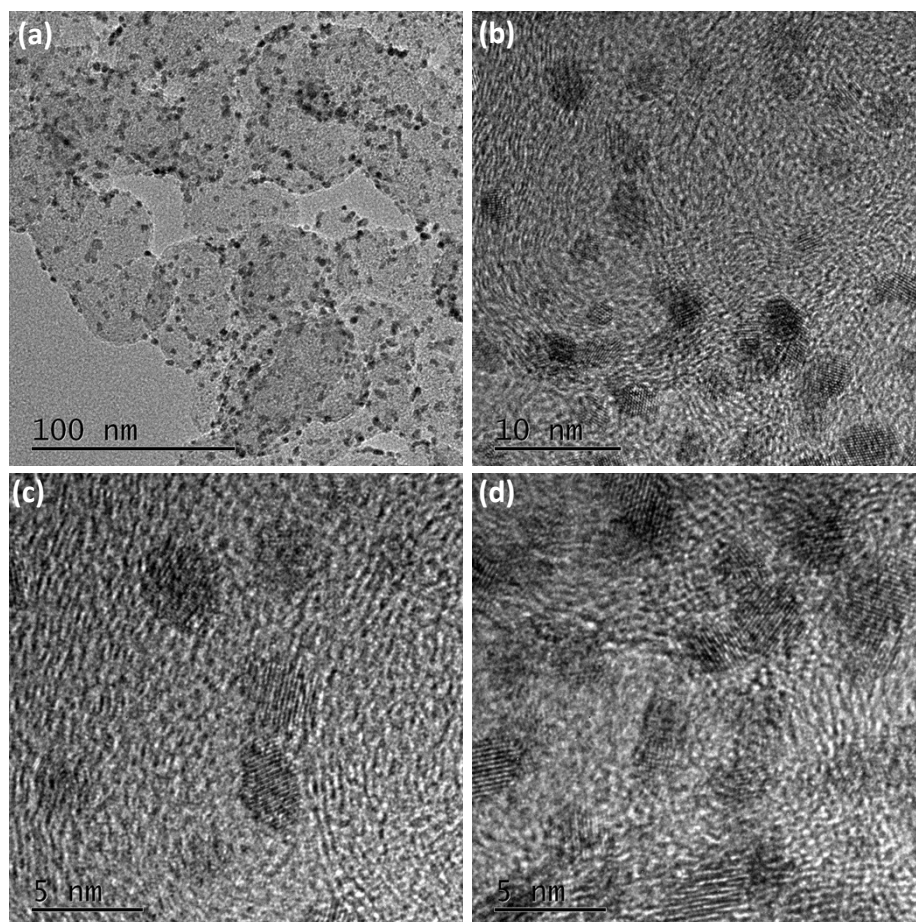

**Fig. S8.** TEM images of the commercial Pt/C catalyst (20 wt%, Sigma Aldrich and Alfa Aesar).

## 10. Comparison of NRR on concave cubic Pt-La alloy NCs, concave cubic Pt NCs and Pt/C catalyst

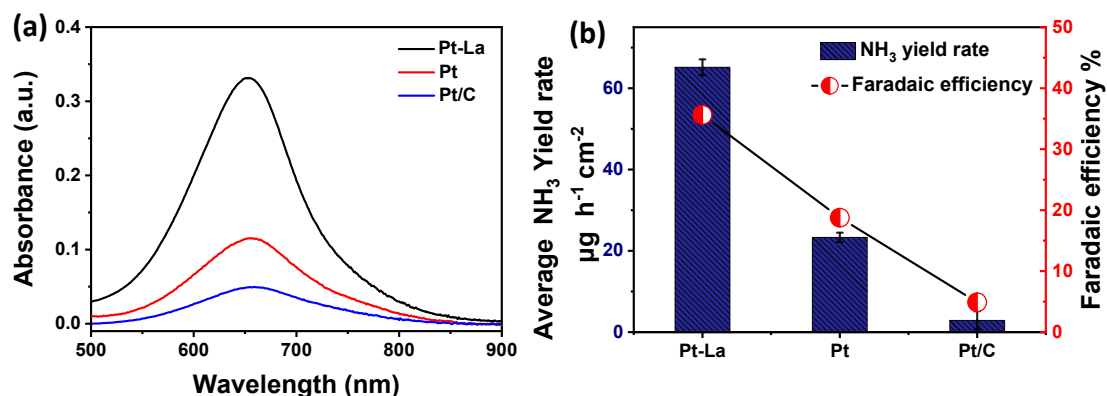

**Fig. S9.** (a) UV-Vis absorption spectra of the electrolytes stained with indophenol blue indicator after NRR electrolysis on the concave cubic Pt-La alloy NCs, concave cubic Pt NCs and Pt/C catalyst (20 wt%, Sigma Aldrich and Alfa Aesar)

## 11. UV-Vis absorption spectra of the electrolytes stained with indophenol blue indicator after NRR electrolysis for different cycling tests

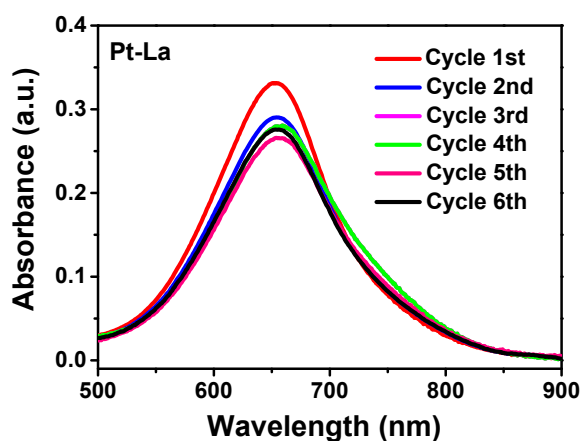

**Fig. S10.** UV-Vis absorption spectra of the electrolytes stained with indophenol blue indicator after NRR electrolysis on the concave cubic Pt-La alloy NCs in 1 mM HCl solution for different cycling tests.

## 12. long-term chronoamperometric test

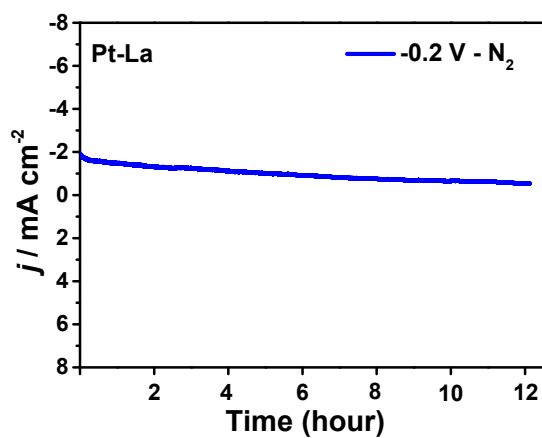

**Fig. S11.**  $i$ - $t$  curves of NRR over concave cubic Pt-La alloy NCs in 1 mM HCl solution at different potentials for 12 hr.

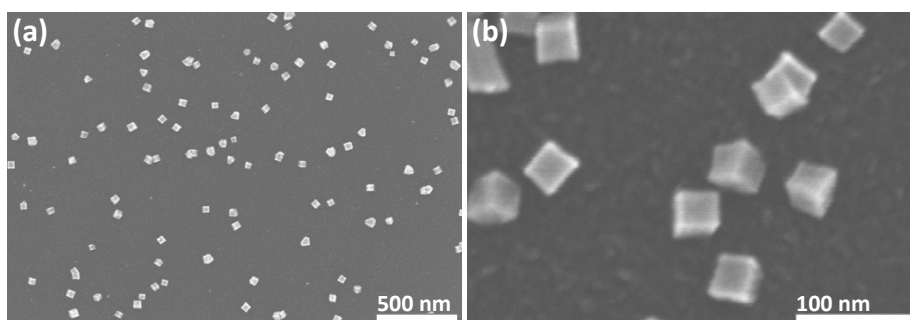

**Fig. S12.** SEM image of the concave cubic Pt-La alloy NCs obtained after NRR endurance cycle test, confirming that the Pt-La alloy NCs still kept the concave cubic shape after the reaction.

### 13. UV-vis absorption spectra of the electrolytes stained with Watt-Chrisp methods

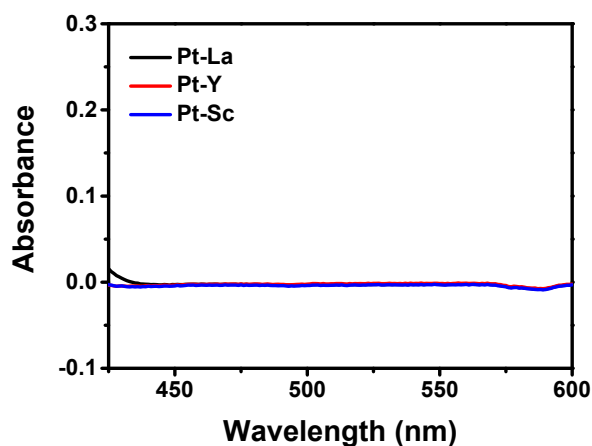

**Fig. S13.** UV-vis absorption spectra of the electrolytes stained with Watt-Chrisp methods after NRR electrolysis on concave cubic Pt-La, Pt-Y and Pt-Sc alloy NCs at -0.4 V for 2 hr.

### 14. Quantitative analysis of $^{15}\text{NH}_3$ by $^1\text{H}$ NMR

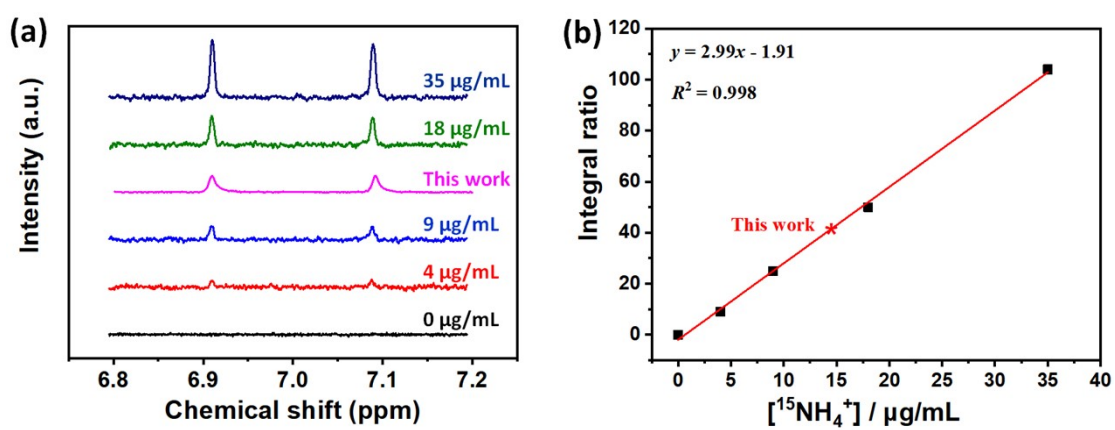

**Fig. S14.** (a)  $^1\text{H}$  NMR analysis of  $^{15}\text{NH}_4\text{Cl}$  standard solutions, and (b)  $^1\text{H}$  NMR calibration plots for the quantification of  $^{15}\text{NH}_4^+$ .

## 15. XPS survey spectra

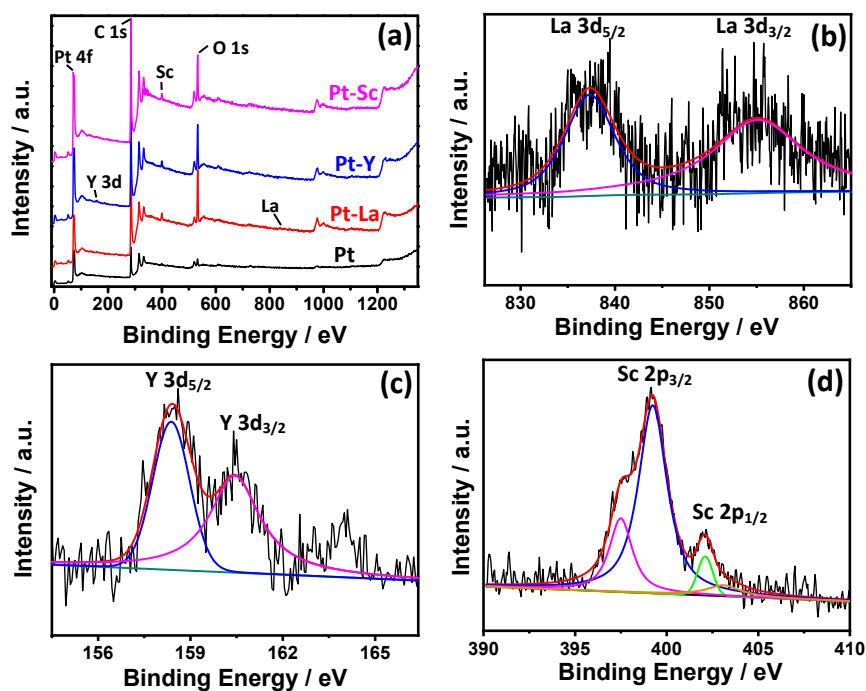

**Fig. S15.** (a) XPS survey spectra of concave cubic Pt, Pt-La, Pt-Y and Pt-Sc NCs. High resolution La 3d (b), Y 3d (c) and Sc 2p (d) spectra of Pt-La, Pt-Y and Pt-Sc samples, respectively.

## 16. Computational methods

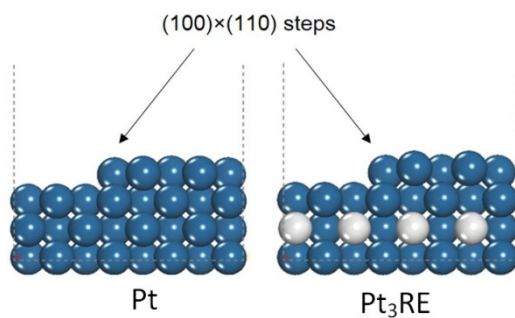

**Fig. S16.** Side views of theoretical models of (100)×(110) steps on Pt and Pt<sub>3</sub>RE (RE = La, Y, Sc).

Blue: Pt; silver: RE (RE = La, Y, Sc). Dashed grey lines indicate the periodical boundaries.

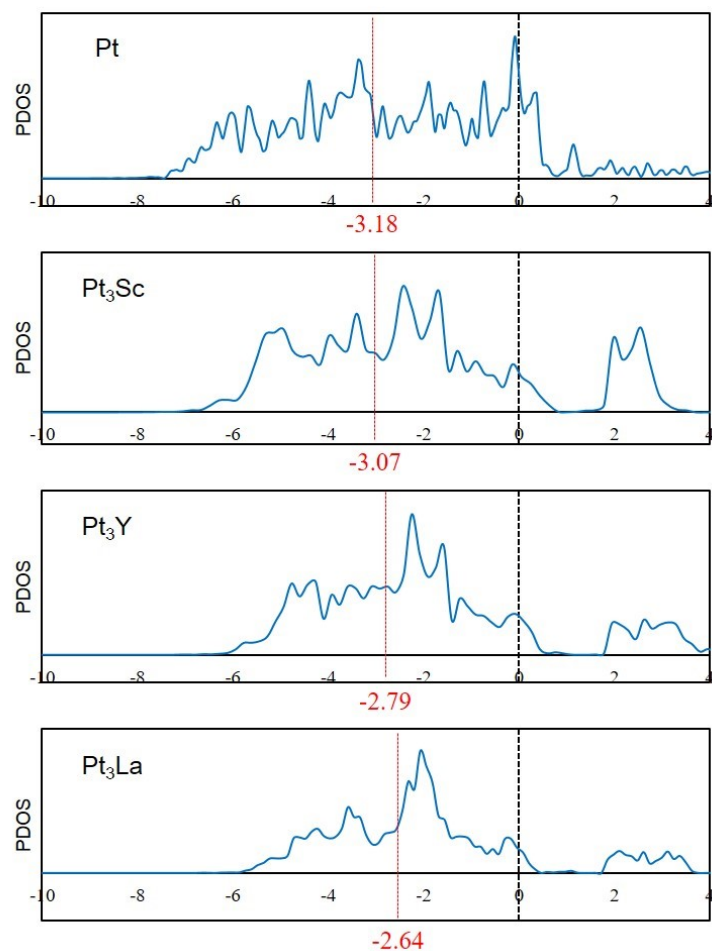

**Fig. S17.** Calculated d-projected density of states of the Pt atoms in bulk Pt and Pt<sub>3</sub>RE (RE = La, Y, Sc). The Fermi level has been set to zero as shown in black dashed lines. The red dashed lines indicates the positions of d-band centres.

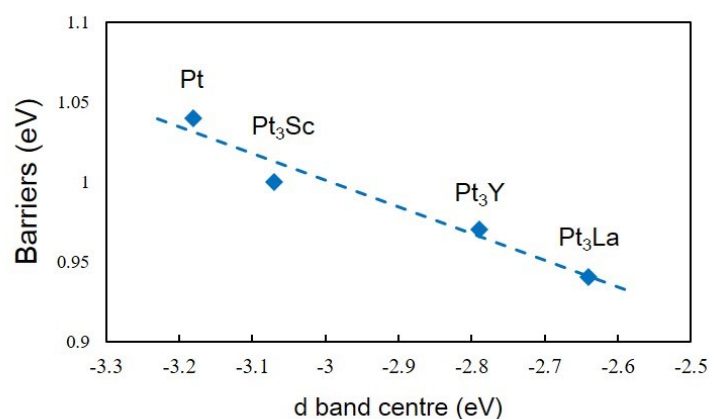

**Fig. S18.** The linear relations between d-band centres of the Pt atoms in bulk Pt and Pt<sub>3</sub>RE (RE = La, Y, Sc) and the overall barriers in nitrogen reduction reactions.

**Table S3.** Calculated Gibbs free reaction energies (unit in eV) of elementary steps for nitrogen reduction reactions at steps on Pt and Pt<sub>3</sub>RE (RE = La, Y, Sc) respectively.

| reactions                                                                           | Pt    | Pt <sub>3</sub> Sc | Pt <sub>3</sub> Y | Pt <sub>3</sub> La |
|-------------------------------------------------------------------------------------|-------|--------------------|-------------------|--------------------|
| $\text{N}_2 + \text{H}^+ + \text{e}^- \rightarrow \text{N}_2\text{H}^*$             | 0.87  | 0.86               | 0.84              | 0.81               |
| $\text{N}_2\text{H}^* + \text{H}^+ + \text{e}^- \rightarrow \text{N}_2\text{H}_2^*$ | 0.17  | 0.14               | 0.13              | 0.13               |
| $\text{N}_2\text{H}_2^* \rightarrow 2\text{NH}^*$                                   | -0.30 | -0.97              | -0.98             | -0.99              |
| $\text{NH}^* + \text{H}^+ + \text{e}^- \rightarrow \text{NH}_2^*$                   | -0.53 | -0.40              | -0.39             | -0.39              |
| $\text{NH}_2^* + \text{H}^+ + \text{e}^- \rightarrow \text{NH}_3$                   | -0.05 | 0.19               | 0.20              | 0.22               |

**Table S4.** Calculated d-band centres (unit in eV) of the Pt atoms in bulk Pt and Pt<sub>3</sub>RE (RE = La, Y, Sc) and the overall barriers (unit in eV) in nitrogen reduction reactions.

|                  | Pt    | Pt <sub>3</sub> Sc | Pt <sub>3</sub> Y | Pt <sub>3</sub> La |
|------------------|-------|--------------------|-------------------|--------------------|
| d-band centres   | -3.18 | -3.07              | -2.79             | -2.64              |
| overall barriers | 1.04  | 1.00               | 0.97              | 0.94               |



## 17. Hydrogen evolution reaction (HER): Experimental and computational

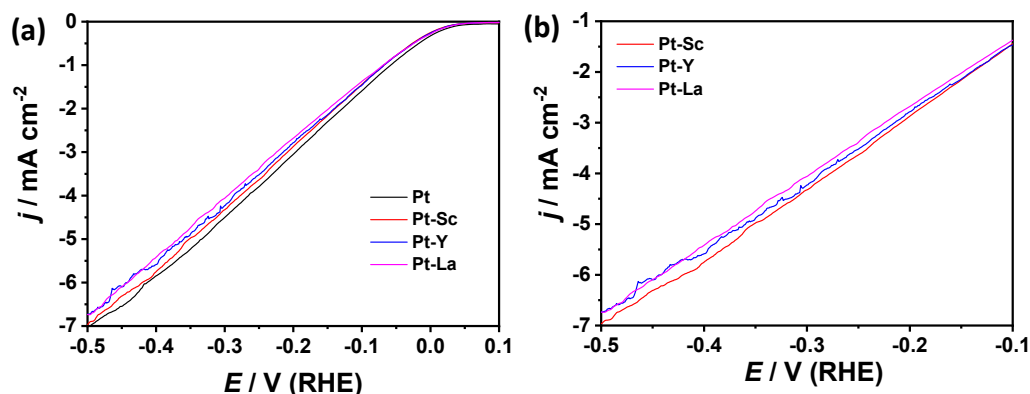

**Fig. S19.** (a) LSV curves of monometallic Pt and Pt-RE (RE = La, Y, Sc) alloy concave nanocubes in Ar-saturated 1 mM HCl solution with a scan rate of  $10 \text{ mV s}^{-1}$ . (b) LSV curves of Pt-RE (RE = La, Y, Sc) alloy concave nanocubes between the potential range from  $-0.10$  and  $-0.50 \text{ V (RHE)}$ .

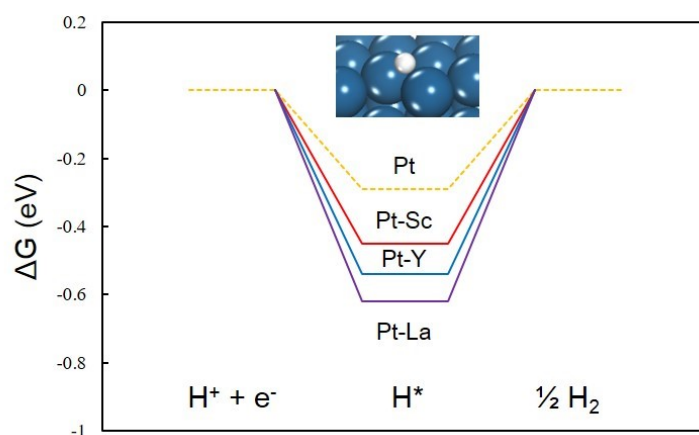

**Fig. S20.** Free energy profiles for HER at steps on Pt and Pt-RE (RE = La, Y, Sc) under the standard hydrogen electrodes condition,  $U = 0 \text{ V vs SHE}$ .

Fig. S19(a) shows LSV curves of monometallic Pt and Pt-RE (RE = La, Y, Sc) alloy concave nanocubes in Ar-saturated 1 mM HCl solution, indicating that the introduction of RE (RE = La, Y, Sc) on Pt step surface can effectively suppress the HER. Particularly, the suppression effect is in the order of  $\text{La} > \text{Y} > \text{Sc}$  between the potential range from  $-0.10$  and  $-0.50 \text{ V (RHE)}$  (Fig. S19(b)), which were applied to NRR electrolysis on PtRENCs. We further carried out density functional theory

(DFT) calculations of the binding energy of  $H^*$  which was suggested as a crucial descriptor for HER activity according to the Sabatier's rules; the value of  $H^*$  binding energy closer to zero indicates the higher activity. The  $H^*$  binding energy at steps gives the order: Pt-La (-0.62 eV) < Pt-Y (-0.54 eV) < Pt-Sc (-0.45 eV) < Pt (-0.29 eV), indicating that the HER activity would be suppressed thus giving a higher FE with the order of Pt-La > Pt-Y > Pt-Sc > Pt (Fig. S20).
